# Supplementary material
Source: publisher site journal article supplement (https://oneecosystem.pensoft.net/article/download/suppl/4276204/)
Supplement: Supplementary file 1

### Supplementary material 1. Ecosystem service activities in Bulgaria

| Study area           | Geographic Scope of the Study | Study Commissioned by             | ES mapped or assessed                    | Method/s                          | Scale          | Type of data (Tier) | Purpose of Study                 | Reference                                |
|----------------------|-------------------------------|-----------------------------------|------------------------------------------|-----------------------------------|----------------|---------------------|----------------------------------|------------------------------------------|
| Malki Iskar basin    | River basin                   | Ministry of Emergency and Risk    | Flood regulation                         | Process based modeling            | Local          | 3                   | Flood hazard assessment          | Nedkov and Burkhard, 2012                |
| Beklemeto area       | Landscape                     | Bulgarian Academy of Sciences     | Global climate regulation                | Direct measurement, Spatial proxy | Local          | 2                   | Part of complex monitoring study | Zhyanski et al. 2016                     |
| Seven Rila Lakes     | Landscape                     | Ministry of Education and Science | Bundle of 20 ES relevant for study area  | Spreadsheet                       | Local          | 1                   | Part of Complex monitoring study | Nedkov et al. 2014                       |
| Strumeshnitsa basin  | River basin                   | EU FP 7 project                   | Erosion regulation                       | Process based modeling            | Local          | 3                   | Water related ES assessment      | Markov and Nedkov, 2016                  |
| Ogosta basin         | River basin                   | EU FP 7 project                   | Water related ES                         | Process based modeling            | Local          | 3                   | Water related ES assessment      | Boyanova, 2015; Boyanova et al, 2016     |
| Yantra basin         | River basin                   | Bulgarian Academy of Sciences     | Flood regulation                         | Process based modeling            | Local          | 3                   | Water related ES assessment      | Nedkov et al, 2016; Boyanova et al, 2014 |
| Selected urban areas | City                          | Ministry of Environment and Water | Carbon storage, local climate regulation | Spatial proxy method              | National/local | 2                   | National ecosystem assessment    | Nedkov et al. 2016; Nedkov et al. 2017   |

|                                          |                          |                                    |                                                              |                                                                                                                               |                    |     |                                           |                           |
|------------------------------------------|--------------------------|------------------------------------|--------------------------------------------------------------|-------------------------------------------------------------------------------------------------------------------------------|--------------------|-----|-------------------------------------------|---------------------------|
| Karlovo Municipality                     | Municipal boundaries     | Ministry of Education and Science  | 10 selected ES <sup>1</sup>                                  | Market price, Value transfer, Replacement cost, Net financial contribution (NFCu)                                             | Local              | 2/3 | Facilitate local governance               | Koulov et al., 2017       |
| Karlovo Municipality                     | Municipal boundaries     | Ministry of Environment and Waters | Health status of Urban Green Infrastructure                  | Remote sensing (UAS) and in-situ observation                                                                                  | Local              | 3   | Facilitate local governance               | Dimitrov et al. (2018)    |
| Apriltsi Municipality, Kalofer Mayoralty | Municipal boundaries     | Ministry of Education and Science  | 5 selected ES <sup>2</sup>                                   | Contingent valuation                                                                                                          | Local              | 3   | Facilitate local governance               | Assenov, & Borisova, 2016 |
| Apriltsi Municipality, Kalofer Mayoralty | Municipal boundaries     | Ministry of Education and Science  | All                                                          | Spatial proxy, Spreadsheet                                                                                                    | Local              | 1   | Facilitate local governance               | Borisova et al., 2015     |
| Lom River Upper Valley                   | Watershed                | Ministry of Education and Science  | Flood regulation                                             | Process based modeling                                                                                                        | Local              | 3   | Facilitate local governance               | Avetisyan et al., 2016    |
| Chepelare Municipality                   | Municipal boundaries     | Ministry of Education and Science  | Wild plants and their outputs, Genetic materials from plants | Market price, Value transfer                                                                                                  | Local              | 2/3 | Facilitate local governance               | Assenov et al., 2016      |
| Chepelare Municipality                   | Municipal boundaries     | Ministry of Education and Science  | 8 selected ES <sup>3</sup>                                   | Market price, Value transfer, Contingent valuation                                                                            | Local              | 2/3 | Facilitate local governance               | Ivanova et al., 2016      |
| “Central Balkan” National Park           | National park boundaries | “Central Balkan” National Park     | 11 selected ES <sup>4</sup>                                  | Market price, Value transfer, Net financial contribution (NFCu), Replacement cost, Travel cost, Contingent valuation, Hedonic | Local/<br>Regional | 2/3 | “Central Balkan” National Park management | Dimitrova et al., 2015    |

|                    |           |                                   |                                                         |                                      |          |   |                             |                           |
|--------------------|-----------|-----------------------------------|---------------------------------------------------------|--------------------------------------|----------|---|-----------------------------|---------------------------|
|                    |           |                                   |                                                         | pricing                              |          |   |                             |                           |
| Ogosta River Basin | Watershed | Ministry of Education and Science | Surface/Ground water for drinking/non-drinking purposes | Process based modeling, Market price | Regional | 3 | Facilitate local governance | Ivanova & Kiryakova, 2016 |

<sup>1</sup>Cultivated crops, Reared animals and their outputs, Wild plants and their outputs, Surface water for drinking, Fibers and other materials from plants and animals for direct use or processing, Materials from plants and animals for agricultural use, Genetic materials from all biota, Mass stabilization, Water flow maintenance, Global climate regulation, Physical use of land-/seascapes in different environmental settings.

<sup>2</sup>Wild plants and their outputs, Wild animals and their outputs, Fibers, Abiotic provisioning - Mineral substances used for material purposes, Physical use of land-/seascapes in different environmental settings

<sup>3</sup>Cultivated crops, Reared animals and their outputs, Wild plants and their outputs, Genetic materials from plants, Ground water for drinking purposes, Fibers for direct use, Plant-based resources, Physical use of land-/seascapes in different environmental settings

<sup>4</sup>Wild plants and their outputs, Fibers for direct use, Genetic materials from all biota, Surface/Ground water for drinking/non-drinking purposes, Global climate regulation, Hydrological cycle and water flow maintenance, Weathering processes, Mass stabilization and control of erosion rates, Educational, Aesthetic, Physical use of land-/seascapes in different environmental settings, Sacred and/or religious
